# Supplementary material for: Association of HIV infection and alcohol use on resting-state functional connectivity and mental health in youth living with perinatal HIV
Source: Research Square preprint supplement (doi:10.21203/rs.3.rs-9266867/v1), 2026-06-05
Supplement: Supplementary file 1 [file 0db07b54fbdeb9bbea2f90cc.docx]

**Supplementary material**

# Participants:

Figure S1: Flowchart detailing the exclusion of participants at different stages of the analysis.

# RsfMRI preprocessing using the CONN Toolbox:

Functional data were realigned using SPM realign & unwarp procedure(1), where all scans were co-registered to a reference image (first scan of the first session) using a least squares approach and a 6 parameter (rigid body) transformation(2), and resampled using b-spline interpolation to correct for motion and magnetic susceptibility interactions. Temporal misalignment between different slices of the functional data was corrected following SPM slice-timing correction (STC) procedure(3), using sinc temporal interpolation to resample each slice BOLD timeseries to a common mid-acquisition time. Potential outlier scans were identified using Artifact Detection Tool (ART) as acquisitions with framewise displacement (FD) above 0.5 mm or global BOLD signal changes above 3 standard deviations(4,5), and a reference BOLD image was computed for each subject by averaging all scans excluding outliers. Functional and anatomical data were normalized into standard MNI space, segmented into grey matter, white matter, and CSF tissue classes, and resampled to 2 mm isotropic voxels following a direct normalization procedure(5,6) using SPM unified segmentation and normalization algorithm(7,8) with the default IXI-549 tissue probability map template. Last, functional data were smoothed using spatial convolution with a Gaussian kernel of 8 mm full width half maximum (FWHM). In addition, functional data were denoised using a standard denoising pipeline(9) including the regression of potential confounding effects characterized by white matter timeseries (5 CompCor noise components), cerebrospinal fluid (CSF) timeseries (5 CompCor noise components), motion parameters and their first order derivatives (12 factors)(10), outlier scans (below 267 factors)(4), session effects and their first order derivatives (2 factors), and linear trends (2 factors) within each functional run, followed by bandpass frequency filtering of the BOLD timeseries(11) between 0.008 Hz and 0.09 Hz. CompCor(12,13) noise components within white matter and CSF were estimated by computing the average BOLD signal as well as the largest principal components orthogonal to the BOLD average, motion parameters, and outlier scans within each subject's eroded segmentation masks. From the number of noise terms included in this denoising strategy, the effective degrees of freedom of the BOLD signal after denoising were estimated to range from 9.1 to 45.6 (average 42.7) across all participants(5).

# Seed-based connectivity analysis in the CONN Toolbox:

To compensate for possible transient magnetization effects at the beginning of each run, individual scans were weighted by a step function convolved with an SPM canonical hemodynamic response function and rectified. Group-level analyses were performed using a General Linear Model (GLM(9)). For each individual voxel a separate GLM was estimated, with first-level connectivity measures at this voxel as dependent variables (one independent sample per subject and one measurement per task or experimental condition, if applicable), and groups or other subject-level identifiers as independent variables. Voxel-level hypotheses were evaluated using multivariate parametric statistics with random-effects across subjects and sample covariance estimation across multiple measurements. Inferences were performed at the level of individual clusters (groups of contiguous voxels). Cluster-level inferences were based on parametric statistics from Gaussian Random Field theory(9,14). Results were thresholded using a combination of a cluster-forming p < 0.001 voxel-level threshold, and a familywise corrected p-FDR < 0.05 cluster-size threshold(15).

# Figures:


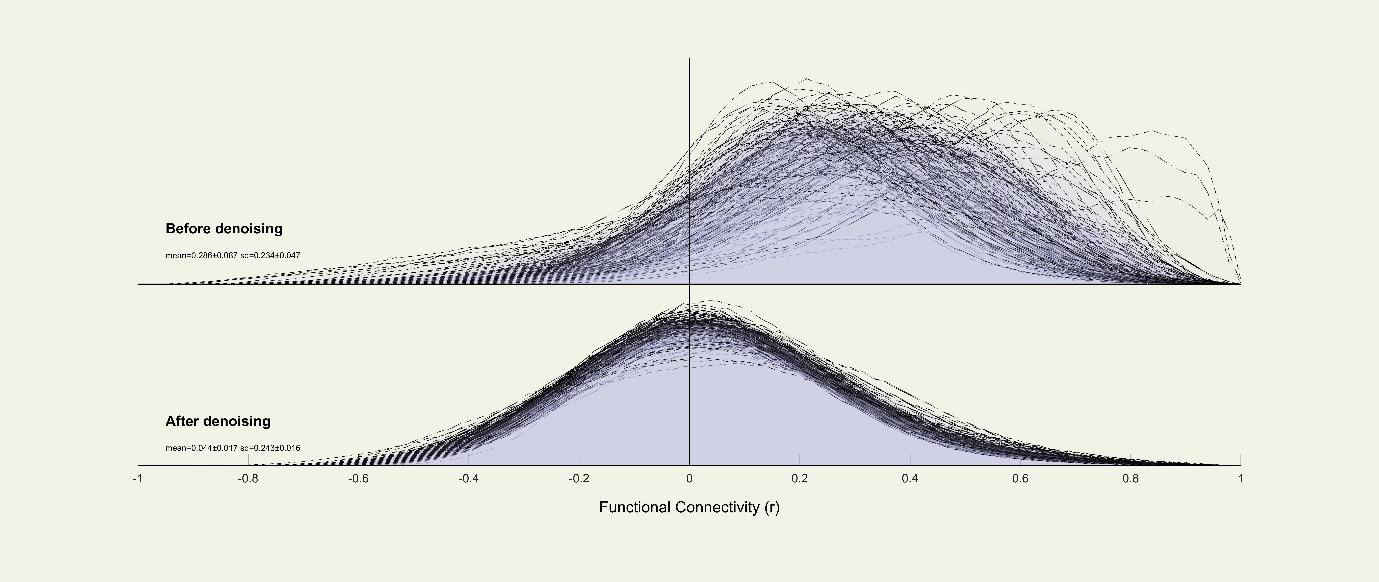
Figure S2: Distribution of functional connectivity values before and after denoising.

# Tables*:*

Table S1: RSFC of ROIs to clusters that are significantly different between YPHIV with and without reported alcohol use.

| **Seed** | **Target(s)** | **Peak MNI coordinates (x,y,z)** | **Cluster size (voxels)** | **p FDR** | **Direction of RSFC** |
| --- | --- | --- | --- | --- | --- |
| **Right caudate** | - 97 voxels (43%) covering 2% of sLOC l (Lateral Occipital Cortex, superior division Left) with center at (-46,-66,+16) - 82 voxels (36%) covering 4% of iLOC l (Lateral Occipital Cortex, inferior division Left) with center at (-48,-68,+10) - 25 voxels (11%) covering 3% of toMTG l (Middle Temporal Gyrus, temporooccipital part Left) with center at (-48,-60,+10) - 9 voxels (4%) covering 1% of AG l (Angular Gyrus Left) with center at (-48,-60,+14) - 15 voxels (7%) covering 0% of not-labeled with center at (-44,-60,+14) | -48 -64 +14 | 228 | 0.027241 | Greater in YPHIV with alcohol use only |

Table S2: RSFC of ROIs to clusters that are significantly associated with depression severity in YPHIV without reported alcohol use.

| **Seed** | **Target(s)** | **Peak MNI coordinates (x,y,z)** | **Cluster size (voxels)** | **p FDR** | **Direction of RSFC** |
| --- | --- | --- | --- | --- | --- |
| **Left amygdala** | - 239 voxels (72%) covering 7% of PostCG r (Postcentral Gyrus Right) with center at (+26,-34,+68) - 60 voxels (18%) covering 1% of PreCG r (Precentral Gyrus Right) with center at (+24,-26,+72) - 31 voxels (9%) covering 0% of not-labeled with center at (+26,-30,+76) | +26 -28 +76 | 330 | 0.006643 | Lower RSFC 🡪 higher CES-D score |

Table S3: RSFC of ROIs to clusters that are significantly associated with depression severity in YPHIV with reported alcohol use only.

| **Seed** | **Target(s)** | **Peak MNI coordinates (x,y,z)** | **Cluster size (voxels)** | **p FDR** | **Direction of RSFC** |
| --- | --- | --- | --- | --- | --- |
| **Left amygdala** | - 373 voxels (76%) covering 12% of PostCG r (Postcentral Gyrus Right) with center at (+26,-34,+68) - 74 voxels (15%) covering 2% of PreCG r (Precentral Gyrus Right) with center at (+24,-26,+72) - 6 voxels (1%) covering 0% of SPL r (Superior Parietal Lobule Right) with center at (+26,-40,+66) - 41 voxels (8%) covering 0% of not-labeled with center at (+30,-28,+74) | +28 -34 +66 | 494 | 0.000710 | Lower RSFC 🡪 higher CES-D score |
|  | - 65 voxels (31%) covering 7% of CO r (Central Opercular Cortex Right) with center at (+56,-16,+14) - 64 voxels (31%) covering 12% of PO r (Parietal Operculum Cortex Right) with center at (+52,-24,+18) - 54 voxels (26%) covering 12% of PT r (Planum Temporale Right) with center at (+56,-22,+12) - 23 voxels (11%) covering 8% of HG r (Heschl's Gyrus Right) with center at (+52,-18,+10) - 2 voxels (1%) covering 0% of not-labeled with center at (+62,-20,+16) | +56 -20 +12 | 208 | 0.034885 | Lower RSFC 🡪 higher CES-D score |

Table S4: RSFC of ROIs to clusters that are significantly associated with depression severity in HIV-negative controls without reported alcohol use.

| **Seed** | **Target(s)** | **Peak MNI coordinates (x,y,z)** | **Cluster size (voxels)** | **p FDR** | **Direction of RSFC** |
| --- | --- | --- | --- | --- | --- |
| **Left thalamus** | - 365 voxels (77%) covering 5% of left frontal pole with center at (-26,+50,+22) - 112 voxels (23%) covering 0% of not-labeled with center at (-22,+38,+20) | -22, +40, +18 | 477 | 0.000637 | Lower RSFC 🡪 Higher CES-D score |
| **Left amygdala** | - 133 voxels (53%) covering 5% of right superior frontal gyrus with center at (+24,+18,+56) - 80 voxels (32%) covering 3% of right middle frontal gyrus with center at (+30,+18,+56) - 37 voxels (15%) covering 0% of not-labeled with center at (+30,+22,+62) | +28, +18, +60 | 250 | 0.038399 | Greater RSFC 🡪 Higher CES-D score |

Table S5: RSFC of ROIs to clusters that are significantly associated with depression severity in HIV-negative controls with alcohol use.

| **Seed** | **Target(s)** | **Peak MNI coordinates (x,y,z)** | **Cluster size (voxels)** | **p FDR** | **Direction of RSFC** |
| --- | --- | --- | --- | --- | --- |
| **Left thalamus** | - 363 voxels (78%) covering 5% of left frontal pole with center at (-28,+50,+22) - 102 voxels (22%) covering 0% of not-labeled with center at (-22,+38,+20) | -28, +50, +24 | 465 | 0.000837 | Lower RSFC 🡪 Higher CES-D score |
| **Left amygdala** | - 156 voxels (63%) covering 5% of right postcentral gyrus with center at (+24,-34,+66) - 73 voxels (29%) covering 2% of right precentral gyrus with center at (+22,-24,+74) - 19 voxels (8%) covering 0% of not-labeled with center at (+24,-26,+76) | +22, -24, +76 | 248 | 0.038027 | Lower RSFC 🡪 Higher CES-D score |
| - 101 voxels (55%) covering 4% of right superior frontal gyrus with center at (+24,+20,+56) - 52 voxels (28%) covering 2% of right middle frontal gyrus with center at (+30,+20,+56) - 32 voxels (17%) covering 0% of not-labeled with center at (+28,+22,+60) | +28, +18, +60 | 185 | 0.047848 | Greater RSFC 🡪 Higher CES-D score |
| - 128 voxels (73%) covering 3% of right lateral occipital cortex, superior division with center at (+36,-62,+48) - 16 voxels (9%) covering 1% of right angular gyrus with center at (+36,-56,+42) - 13 voxels (7%) covering 1% of right superior parietal lobule with center at (+34,-54,+46) - 18 voxels (10%) covering 0% of not-labeled with center at (+34,-54,+40) | +34, -60, +48 | 175 | 0.047848 | Greater RSFC Higher 🡪 CES-D score |

References:

1. Andersson JLR, Hutton C, Ashburner J, Turner R, Friston K. Modeling Geometric Deformations in EPI Time Series. NeuroImage [Internet]. 2001 May [cited 2025 Jun 30];13(5):903–19. Available from: https://linkinghub.elsevier.com/retrieve/pii/S1053811901907463

2. Friston KarlJ, Ashburner J, Frith CD, Poline J ‐B., Heather JD, Frackowiak RSJ. Spatial registration and normalization of images. Hum Brain Mapp [Internet]. 1995 Jan [cited 2025 Jun 30];3(3):165–89. Available from: https://onlinelibrary.wiley.com/doi/10.1002/hbm.460030303

3. Sladky R, Friston KJ, Tröstl J, Cunnington R, Moser E, Windischberger C. Slice-timing effects and their correction in functional MRI. NeuroImage [Internet]. 2011 Sep [cited 2025 Jun 30];58(2):588–94. Available from: https://linkinghub.elsevier.com/retrieve/pii/S1053811911007245

4. Power JD, Mitra A, Laumann TO, Snyder AZ, Schlaggar BL, Petersen SE. Methods to detect, characterize, and remove motion artifact in resting state fMRI. NeuroImage [Internet]. 2014 Jan [cited 2025 Jun 30];84:320–41. Available from: https://linkinghub.elsevier.com/retrieve/pii/S1053811913009117

5. Nieto-Castanon A. Preparing fMRI Data for Statistical Analysis. In: Filippi M, editor. fMRI Techniques and Protocols [Internet]. New York, NY: Springer US; 2025 [cited 2025 Jun 30]. p. 163–91. (Neuromethods; vol. 220). Available from: https://link.springer.com/10.1007/978-1-0716-4438-6_6

6. Calhoun VD, Wager TD, Krishnan A, Rosch KS, Seymour KE, Nebel MB, et al. The impact of T1 versus EPI spatial normalization templates for fMRI data analyses. Hum Brain Mapp [Internet]. 2017 Nov [cited 2025 Jun 30];38(11):5331–42. Available from: https://onlinelibrary.wiley.com/doi/10.1002/hbm.23737

7. Ashburner J, Friston KJ. Unified segmentation. NeuroImage [Internet]. 2005 Jul [cited 2025 Jun 30];26(3):839–51. Available from: https://linkinghub.elsevier.com/retrieve/pii/S1053811905001102

8. Ashburner J. A fast diffeomorphic image registration algorithm. NeuroImage [Internet]. 2007 Oct [cited 2025 Jun 30];38(1):95–113. Available from: https://linkinghub.elsevier.com/retrieve/pii/S1053811907005848

9. Nieto-Castanon A. Handbook of functional connectivity magnetic resonance imaging methods in CONN. Boston, MA: Hilbert Press; 2020. 108 p.

10. Friston KJ, Williams S, Howard R, Frackowiak RSJ, Turner R. Movement‐Related effects in fMRI time‐series. Magn Reson Med [Internet]. 1996 Mar [cited 2025 Jun 30];35(3):346–55. Available from: https://onlinelibrary.wiley.com/doi/10.1002/mrm.1910350312

11. Hallquist MN, Hwang K, Luna B. The nuisance of nuisance regression: Spectral misspecification in a common approach to resting-state fMRI preprocessing reintroduces noise and obscures functional connectivity. NeuroImage [Internet]. 2013 Nov [cited 2025 Jun 30];82:208–25. Available from: https://linkinghub.elsevier.com/retrieve/pii/S1053811913006265

12. Behzadi Y, Restom K, Liau J, Liu TT. A component based noise correction method (CompCor) for BOLD and perfusion based fMRI. NeuroImage [Internet]. 2007 Aug [cited 2025 Jun 30];37(1):90–101. Available from: https://linkinghub.elsevier.com/retrieve/pii/S1053811907003837

13. Chai XJ, Castañón AN, Öngür D, Whitfield-Gabrieli S. Anticorrelations in resting state networks without global signal regression. NeuroImage [Internet]. 2012 Jan [cited 2025 Jun 30];59(2):1420–8. Available from: https://linkinghub.elsevier.com/retrieve/pii/S1053811911009657

14. Worsley KJ, Marrett S, Neelin P, Vandal AC, Friston KJ, Evans AC. A unified statistical approach for determining significant signals in images of cerebral activation. Hum Brain Mapp. 1996;4(1):58–73.

15. Chumbley J, Worsley K, Flandin G, Friston K. Topological FDR for neuroimaging. NeuroImage [Internet]. 2010 Feb [cited 2025 Jun 30];49(4):3057–64. Available from: https://linkinghub.elsevier.com/retrieve/pii/S1053811909012245
